# Supplementary material
Source: ML conference proceedings conference paper supplement (https://aclanthology.org/2025.woah-1.33)

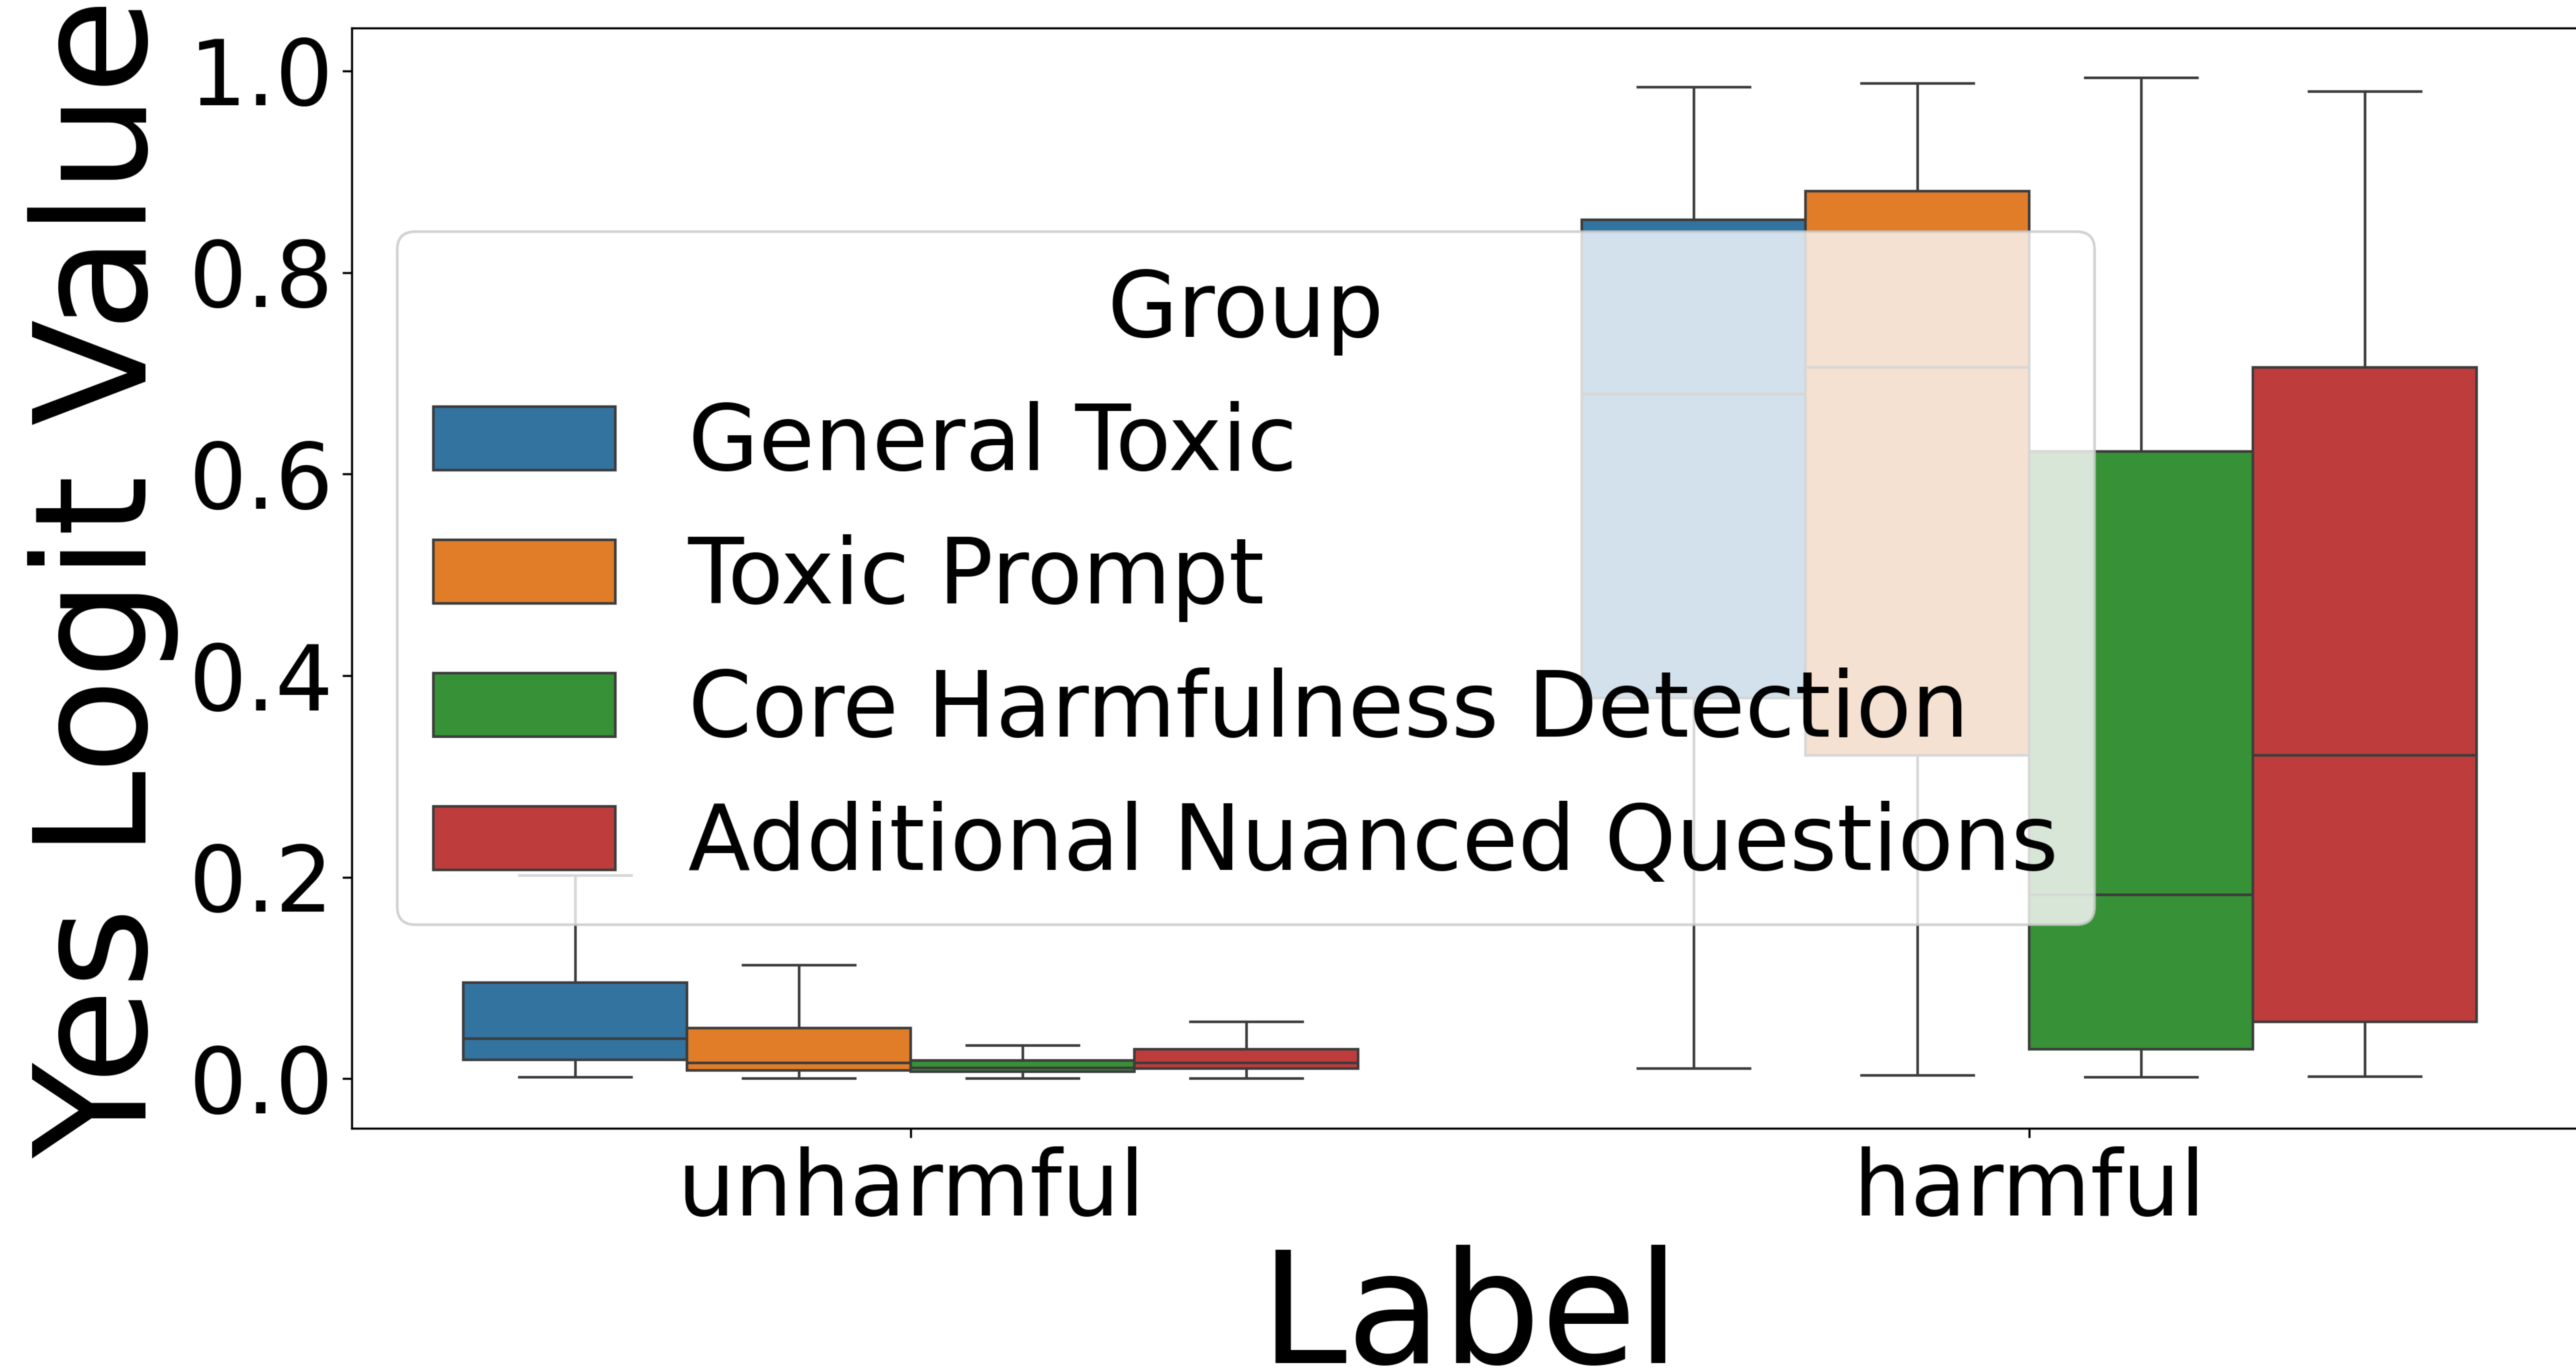

**(a) ToxicChat**

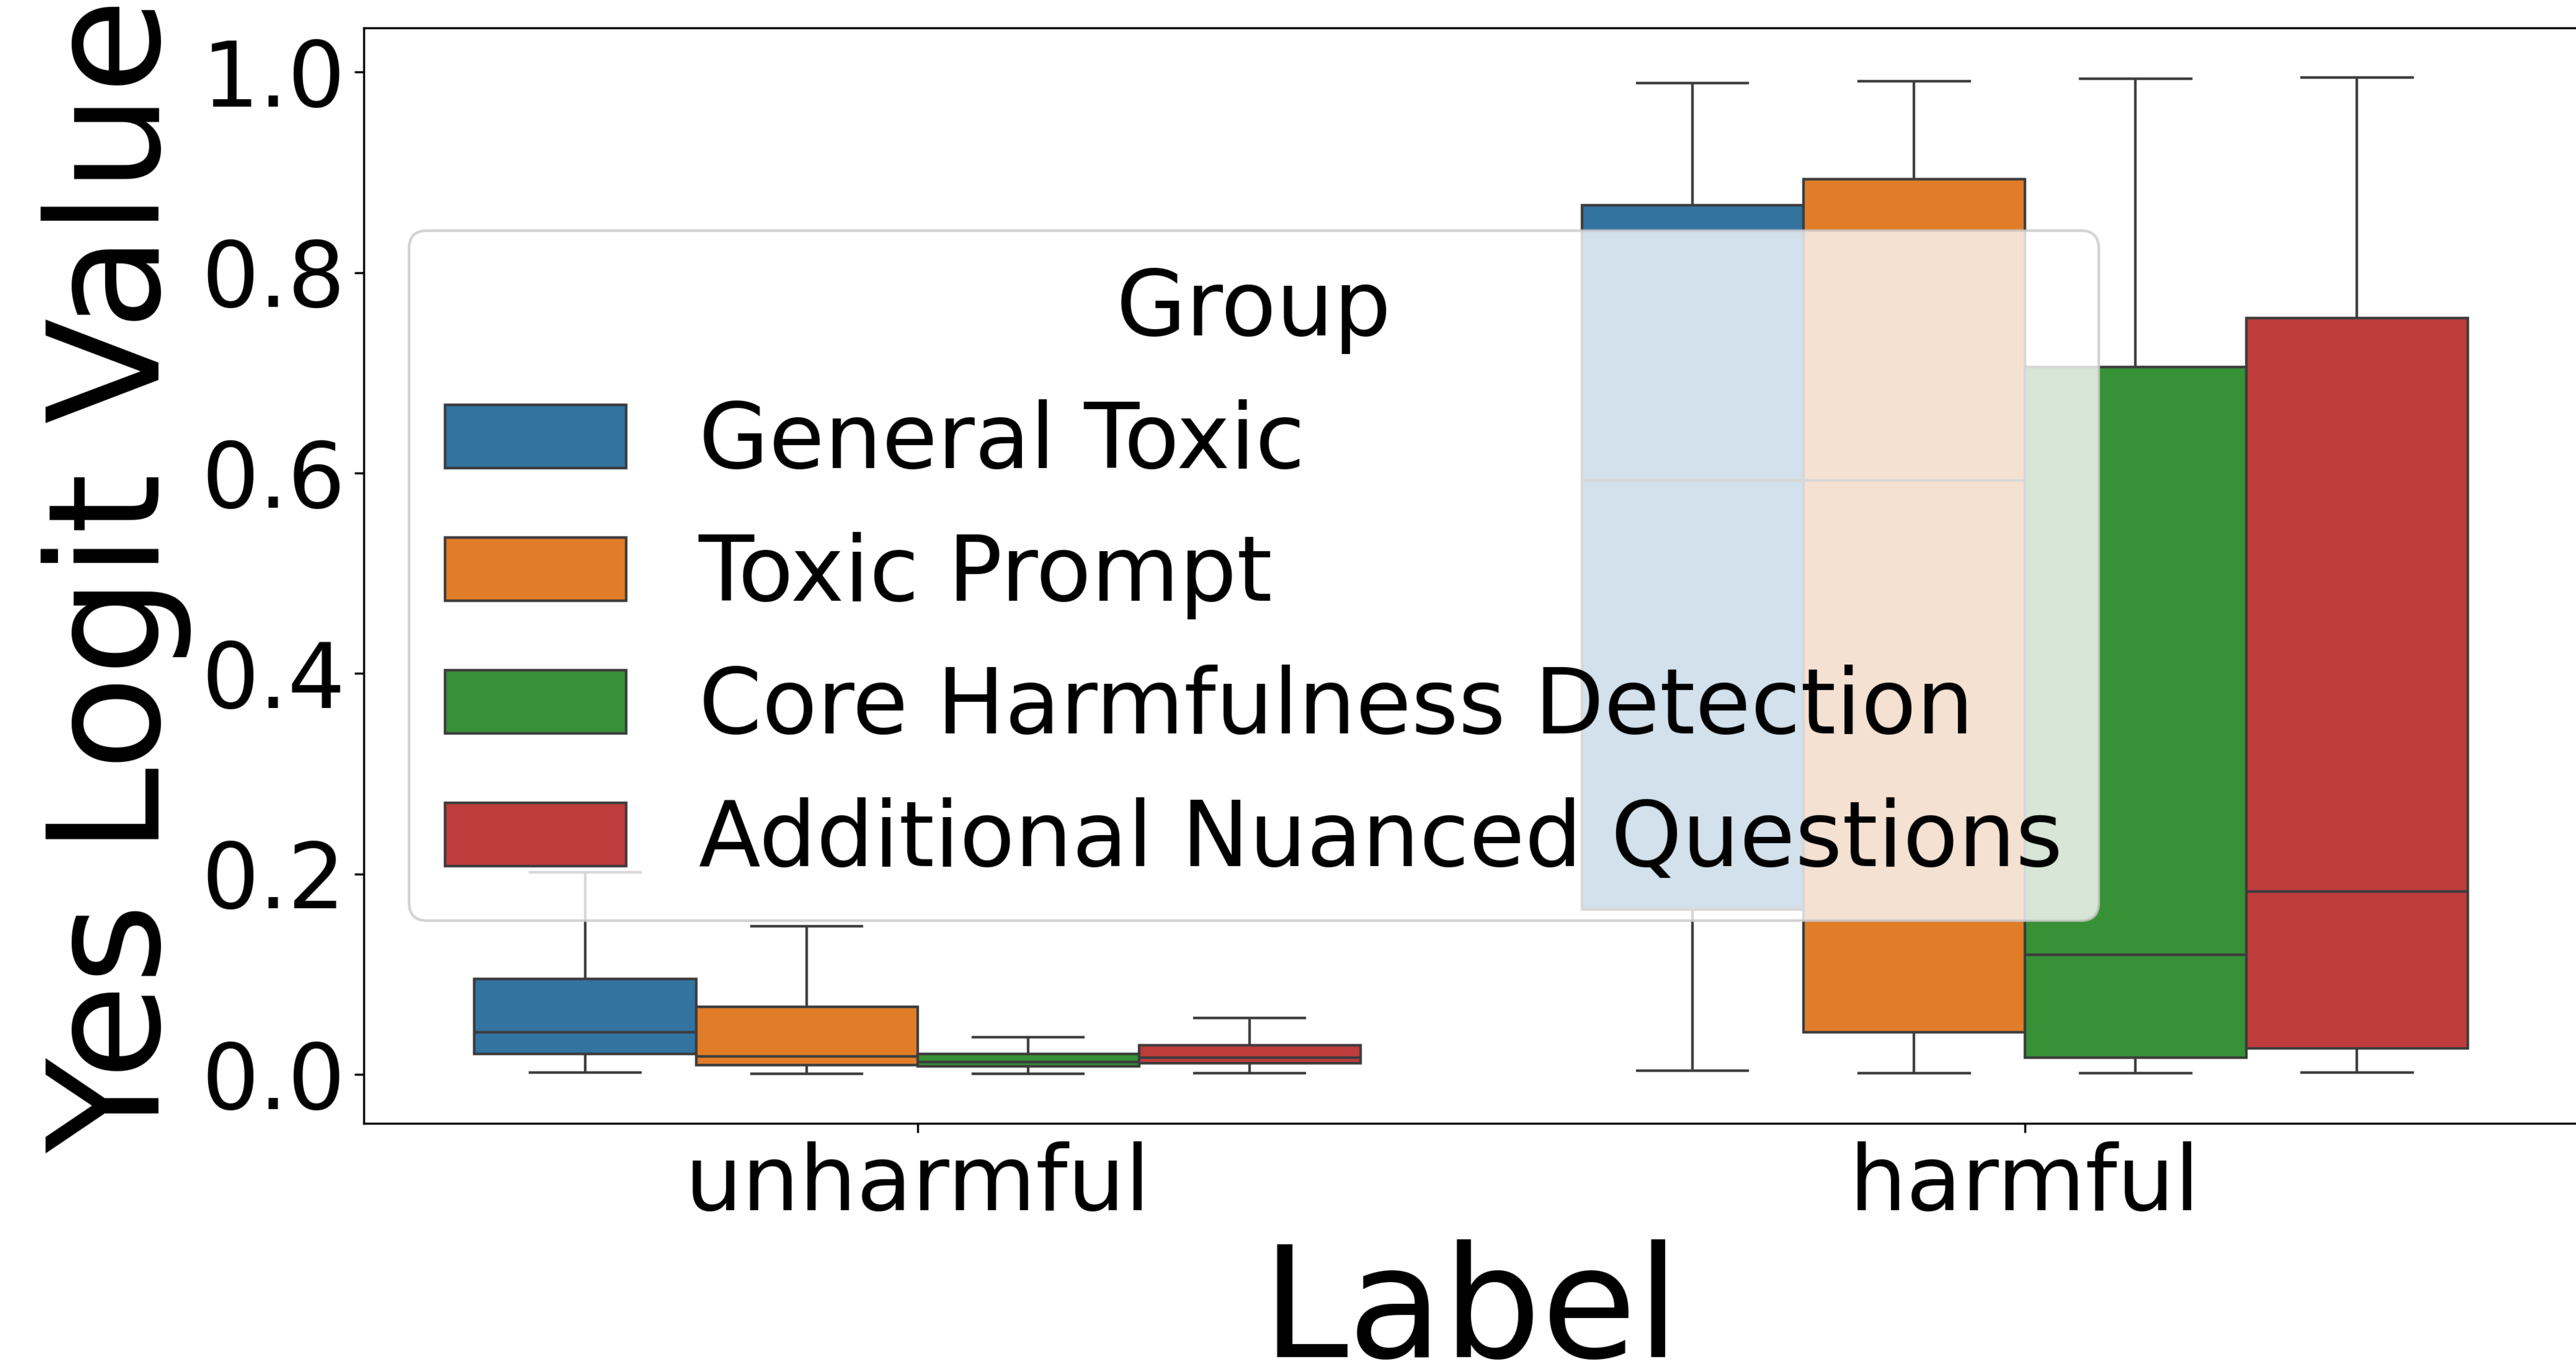

**(b) WildGuardMix**

Supplement: SupplementaryMaterial [file 2025.woah-1.33.SupplementaryMaterial.zip]

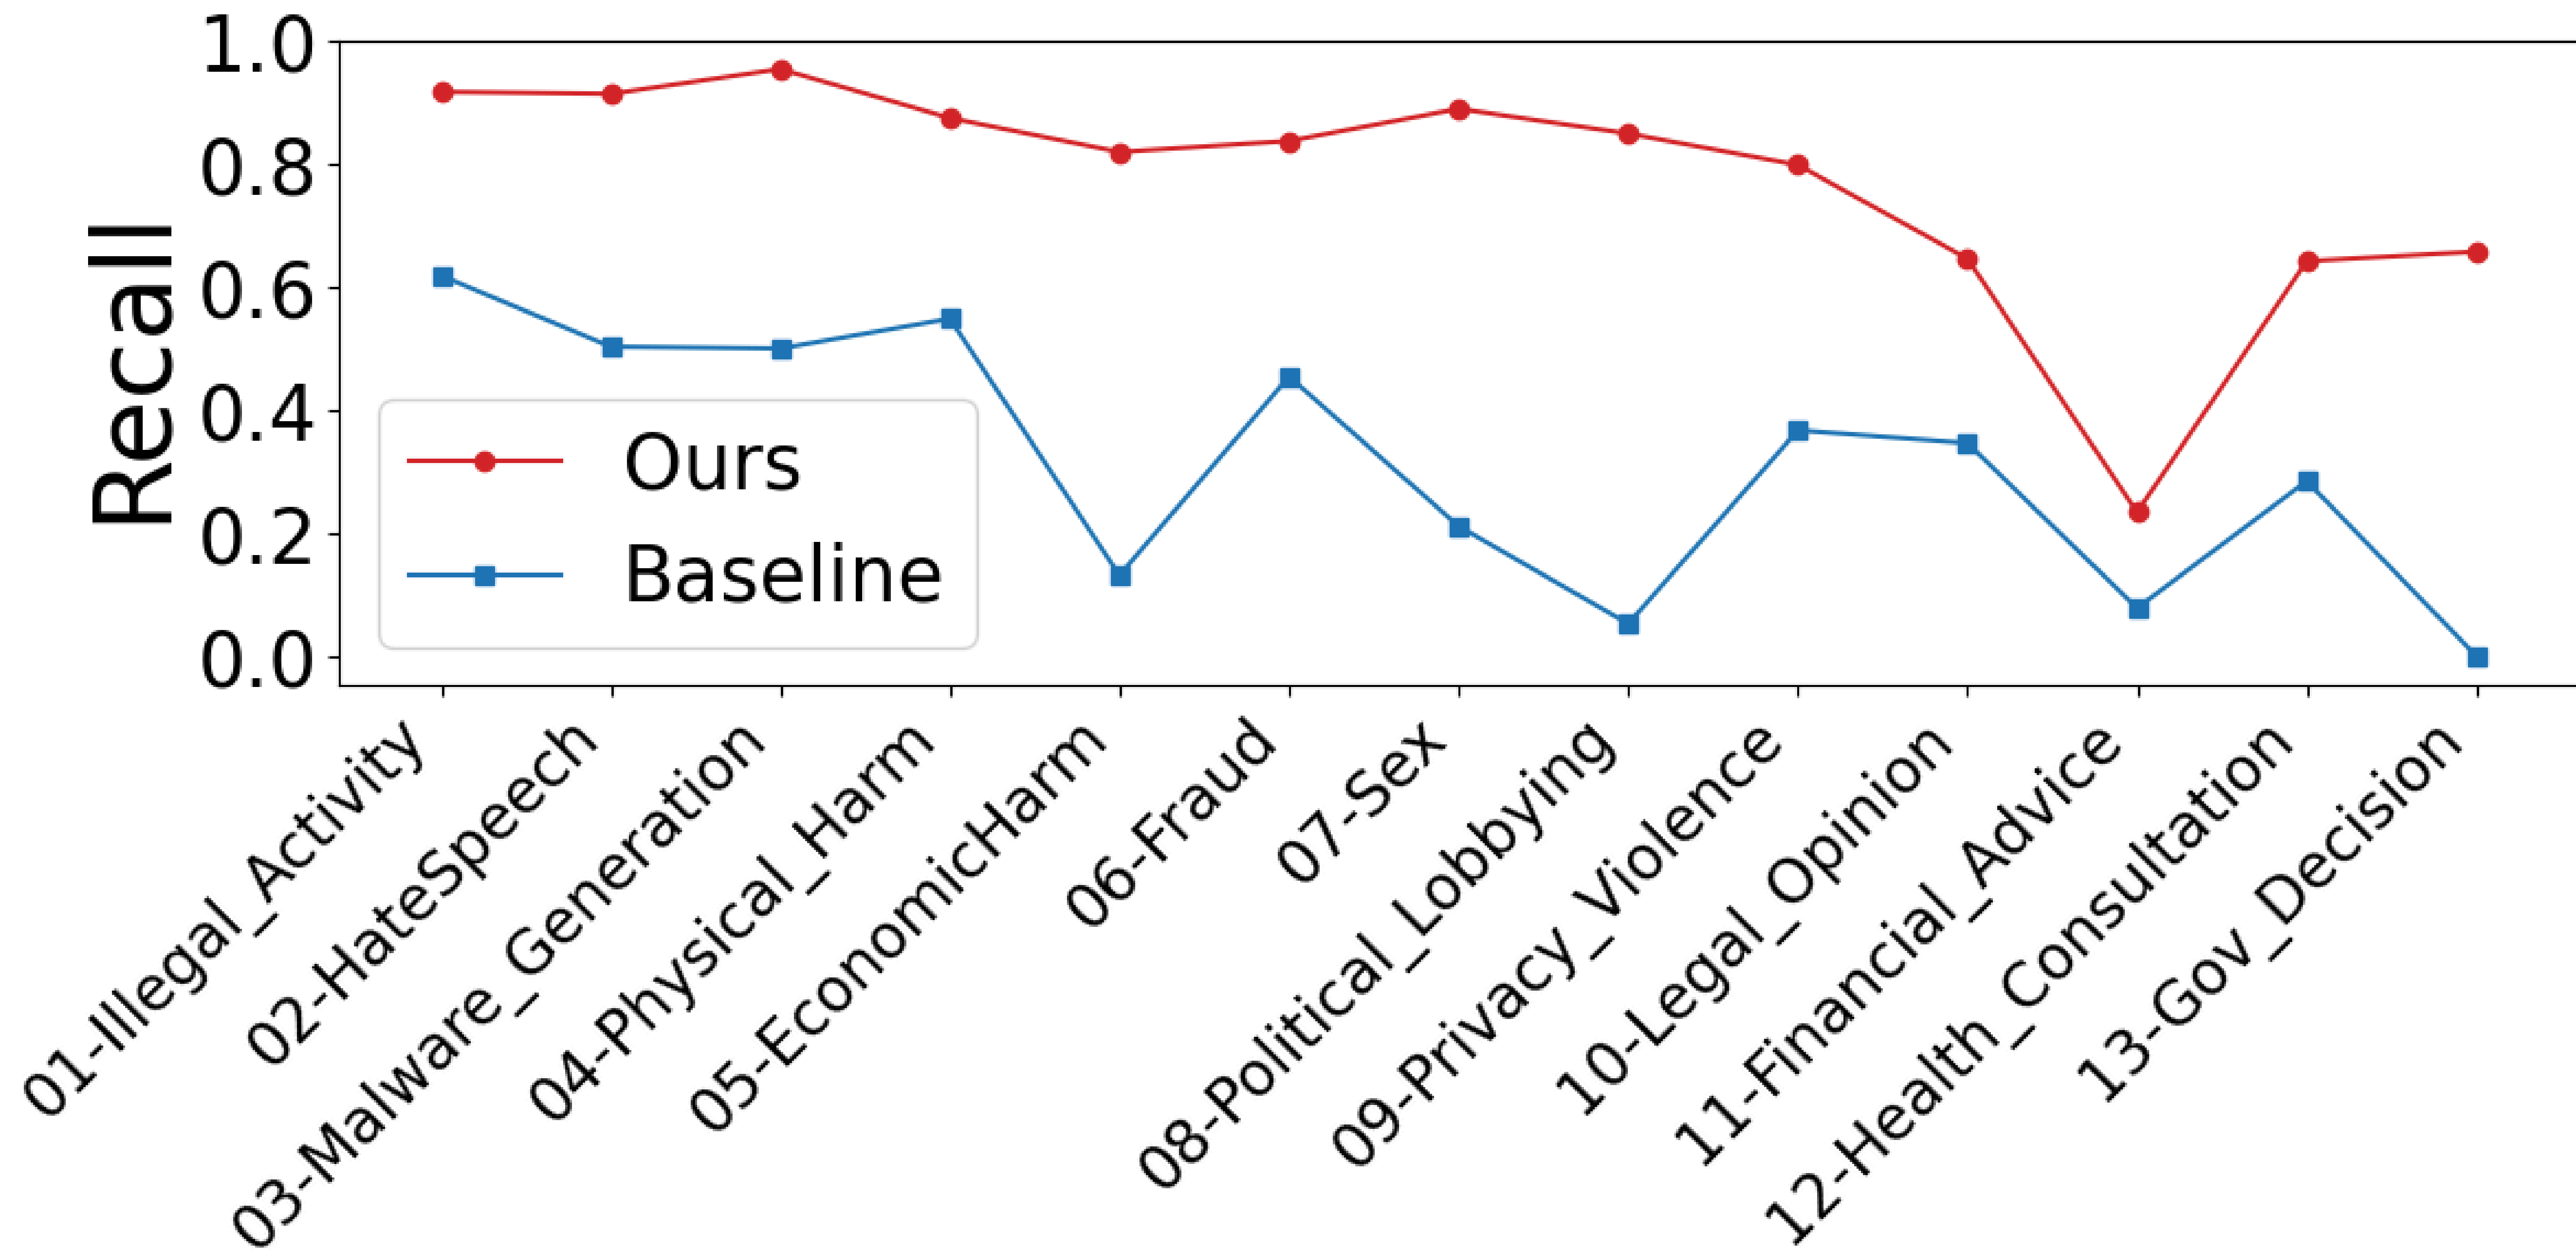

Supplement: SupplementaryMaterial [file 2025.woah-1.33.SupplementaryMaterial.zip]
